# Supplementary material for: Intercontinental transport of biomass burning pollutants over the Mediterranean Basin during the summer 2014 ChArMEx-GLAM airborne campaign
Source: Copernicus journal article supplement (doi:10.5194/acp-18-6887-2018), 2018-05-16
Supplement: Supplementary file 1 [file acp-18-6887-2018-supplement.pdf]

Supplement of Atmos. Chem. Phys., 18, 6887–6906, 2018  
<https://doi.org/10.5194/acp-18-6887-2018-supplement>  
© Author(s) 2018. This work is distributed under  
the Creative Commons Attribution 4.0 License.

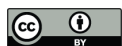

*Supplement of*

## **Intercontinental transport of biomass burning pollutants over the Mediterranean Basin during the summer 2014 ChArMEx-GLAM airborne campaign**

**Vanessa Brocchi et al.**

*Correspondence to:* Giséle Krysztofiak ([gisele.krysztofiak@cnrs-orleans.fr](mailto:gisele.krysztofiak@cnrs-orleans.fr))

The copyright of individual parts of the supplement might differ from the CC BY 4.0 License.

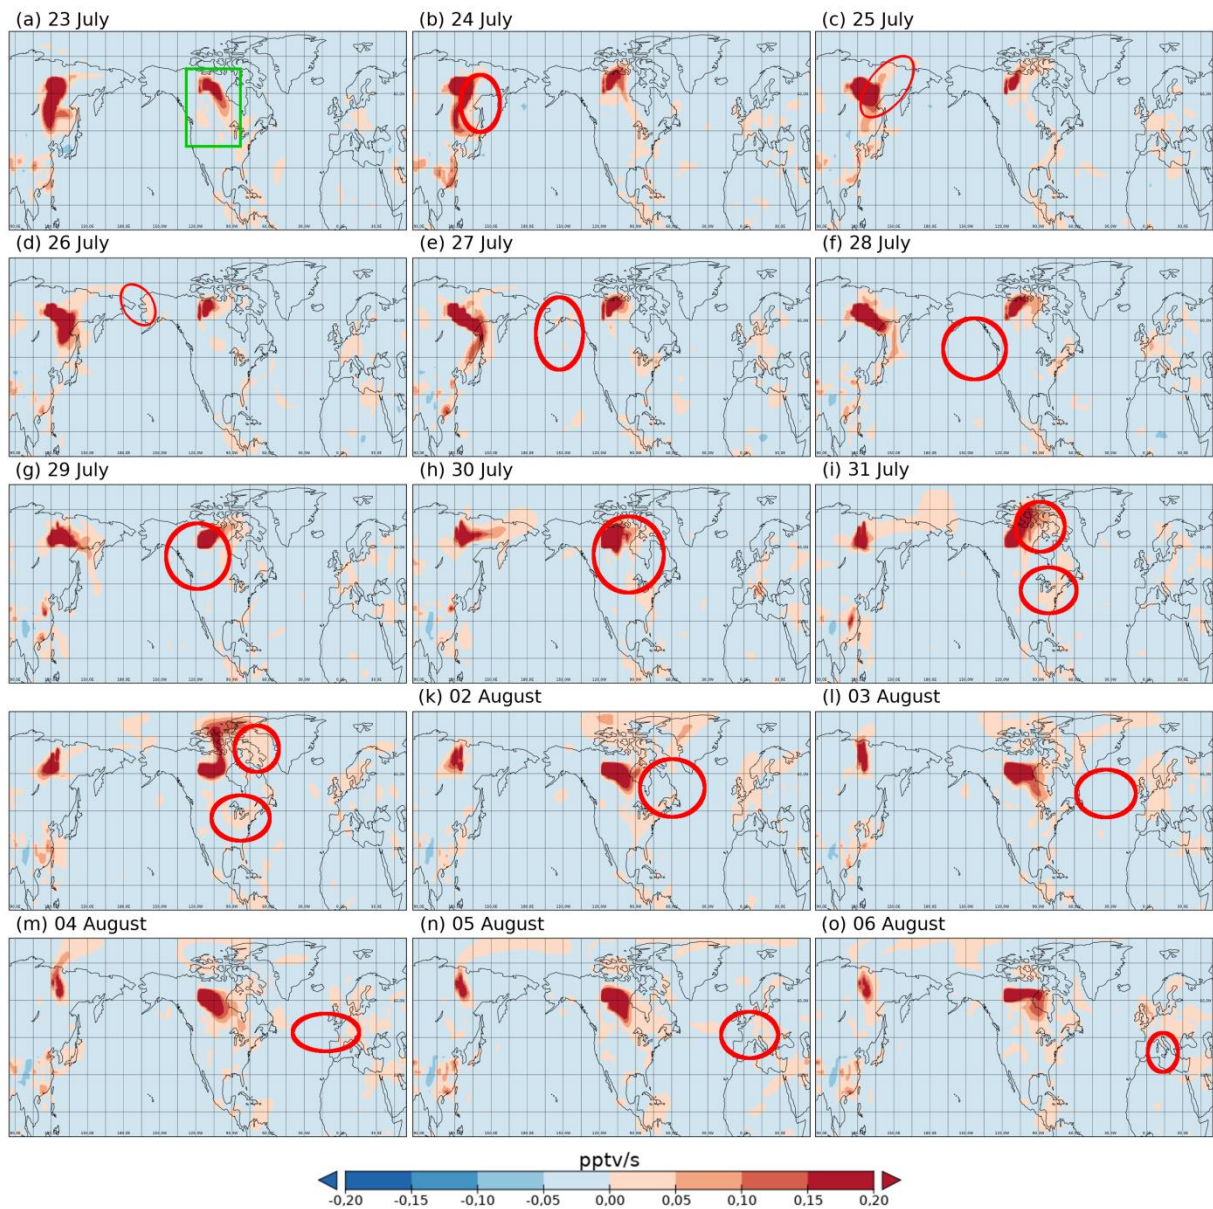

**S1.** Production of O<sub>3</sub> (in pptv s<sup>-1</sup>) between 23 July and 6 August 2014 at 5.5 km in altitude simulated by the MOCAGE model. The red ellipses are used to follow the production of O<sub>3</sub> along the trajectory from Siberia to the MB.

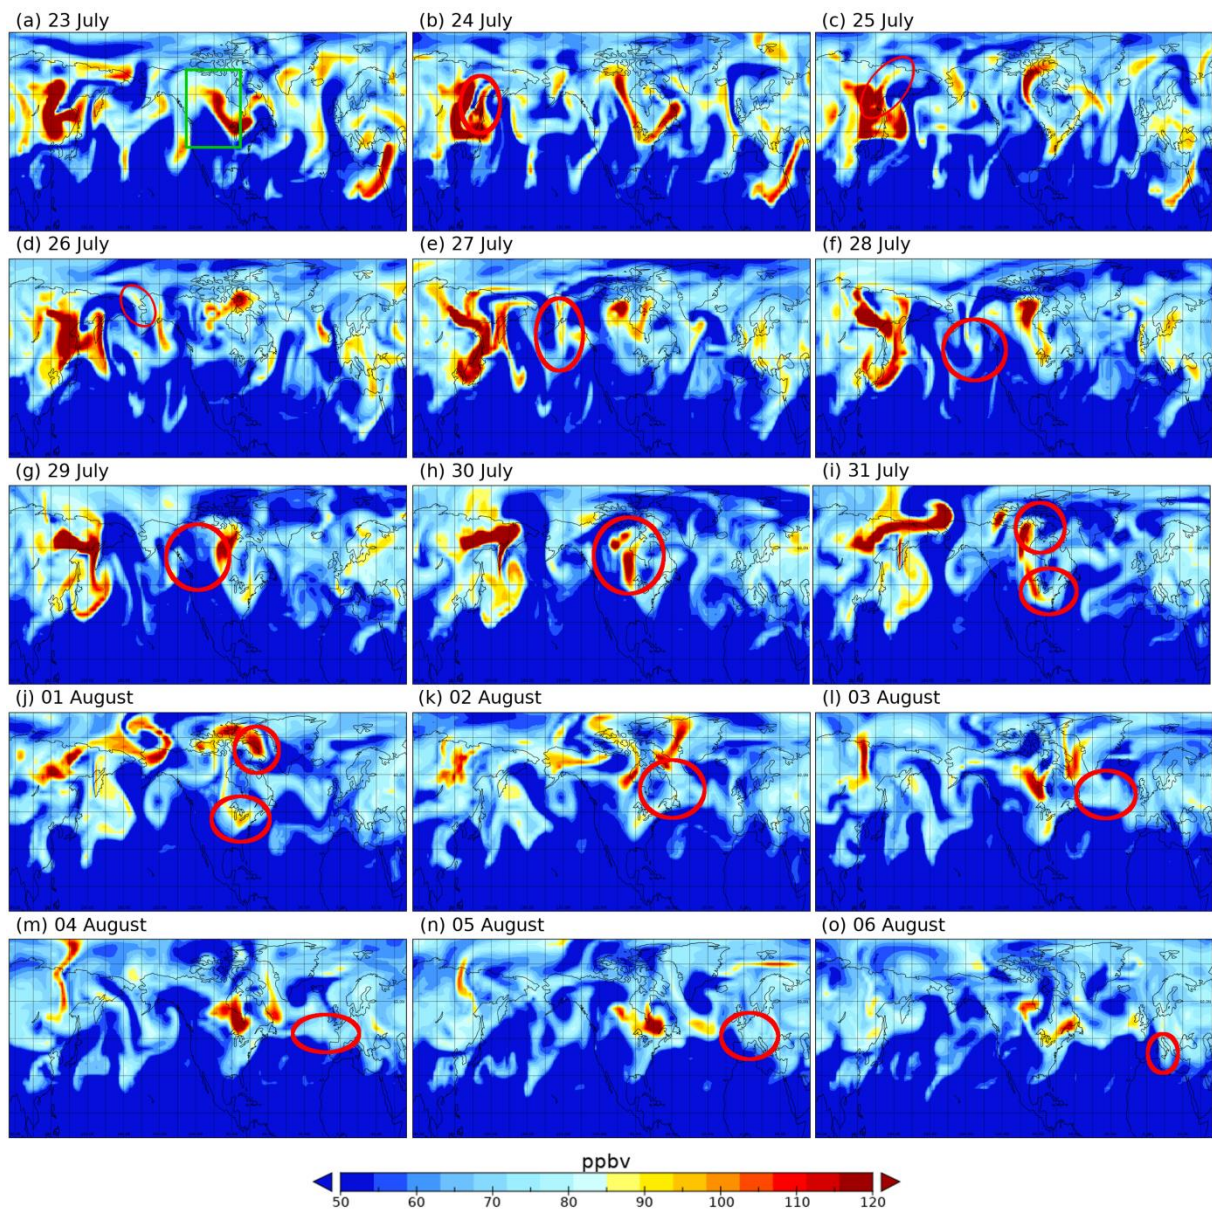

**S2.** Concentrations of O<sub>3</sub> (in ppbv) between 23 July and 6 August 2014 at 5.5 km in altitude simulated by the MOCAGE model. The red ellipses are used to follow the biomass burning trace in O<sub>3</sub> along the trajectory from Siberia to the MB.
